# Supplementary material for: Novel peptides from sea cucumber intestinal hydrolysates promote longitudinal bone growth in adolescent mice through accelerating cell cycle progress by regulating glutamine metabolism
Source: Royal Society of Chemistry journal article supplement (doi:10.1039/d2fo01063a), 2022-01-01
Supplement: d2fo01063a2.pdf [file d2fo01063a2.pdf]

**Supplementary Table 1. Detail of primers for quantitative fluorescence PCR**

| Gene           | Forward primer (5'-3')           | Reverse primer (5'-3')       |
|----------------|----------------------------------|------------------------------|
| <i>Sox9</i>    | 5'- CTTCCGAGCTACAGAGGGAAC-3'     | 5'- TAGTCCACCCCTCCTCACATT-3' |
| <i>β-actin</i> | 5'-AGCAACTAAACAACCTGCCAGTACTA-3' | 5'-CGATGGCTACCCTTTGCTTCT-3'  |

**Supplementary Table 2. The daily food intake, body weight and visceral index of mice**

| Group            | Daily food intake (g) | Body weight gain (g) | Liver index (mg/g) | Fat index (mg/g) |
|------------------|-----------------------|----------------------|--------------------|------------------|
| <i>Normal</i>    | 4.02 ± 0.23           | 10.46 ± 1.81         | 47.21 ± 2.95       | 12.89 ± 3.46     |
| <i>Glutamine</i> | 3.92 ± 0.56           | 10.35 ± 2.18         | 47.00 ± 3.92       | 12.84 ± 2.37     |
| <i>SCIP-L</i>    | 4.03 ± 0.21           | 10.61 ± 1.57         | 46.33 ± 5.33       | 12.50 ± 3.39     |
| <i>SCIP-H</i>    | 3.97 ± 0.44           | 10.84 ± 1.85         | 48.16 ± 4.37       | 12.09 ± 4.63     |
