# Supplementary figures and images for: Novel peptides from sea cucumber intestinal hydrolysates promote longitudinal bone growth in adolescent mice through accelerating cell cycle progress by regulating glutamine metabolism
Source: Royal Society of Chemistry journal article supplement (doi:10.1039/d2fo01063a), 2022-01-01

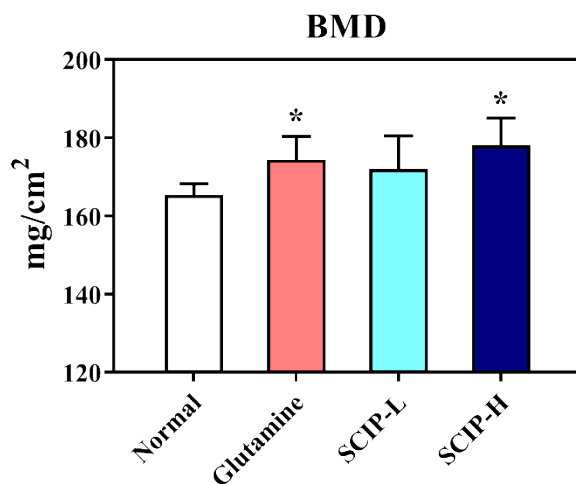

**Supplementary Figure 1:** Effect of SCIP on longitudinal bone mineral density in adolescent mice.

Supplement: d2fo01063a1.pdf [file d2fo01063a1.pdf]

1.

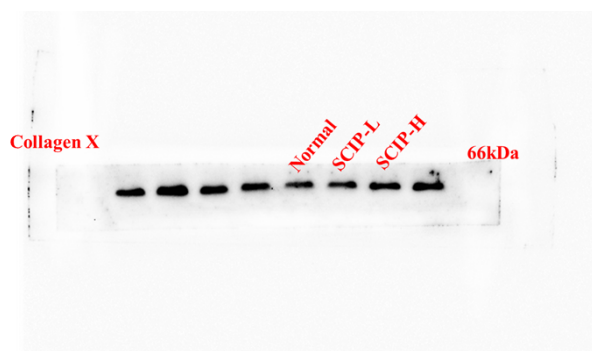

2.

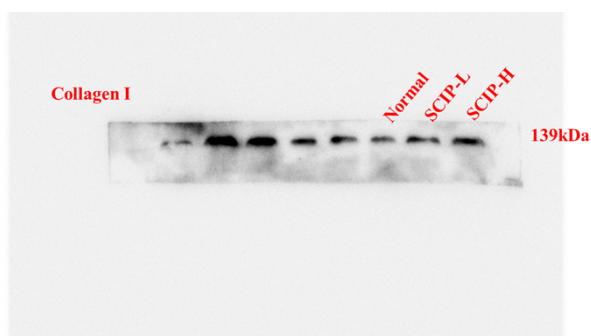

3.

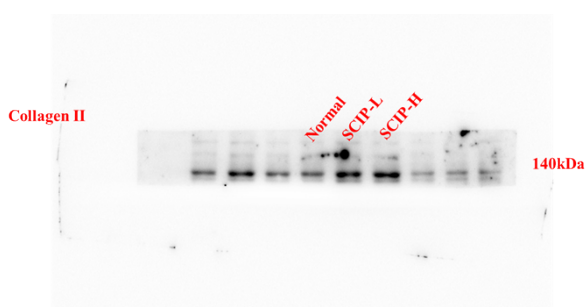

4.

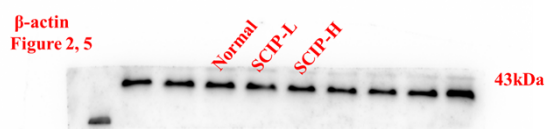

5.

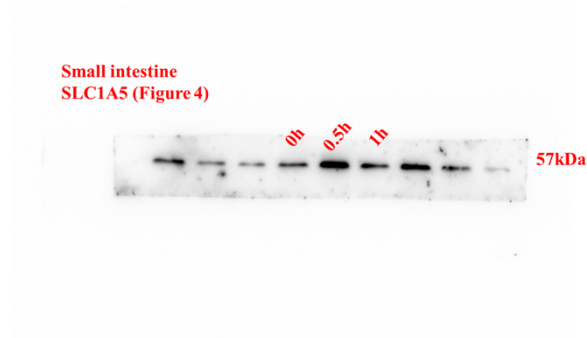

6.

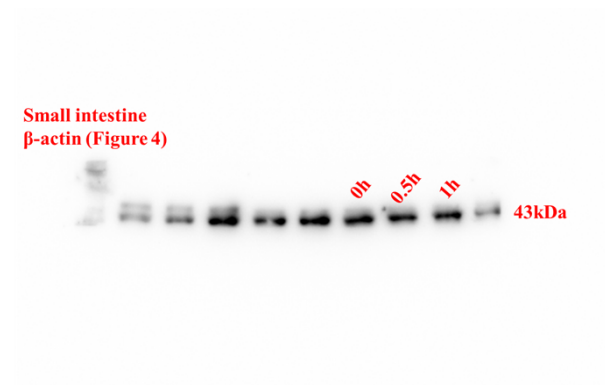

7.

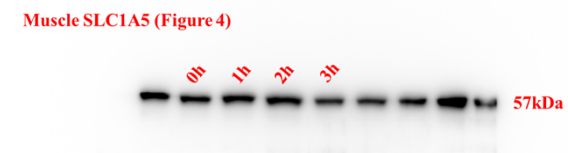

8.

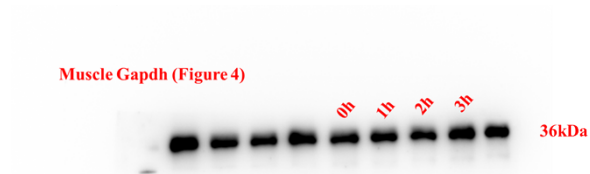

9.

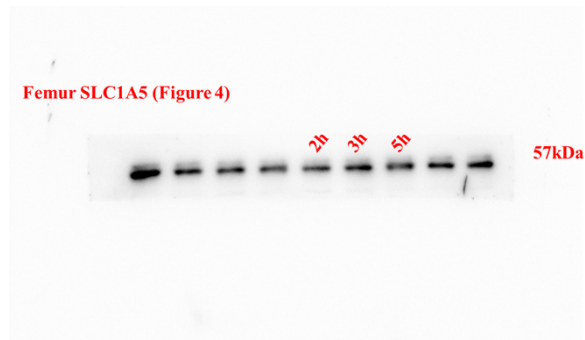

10.

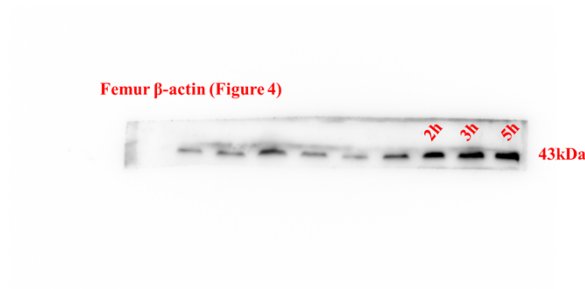

11.

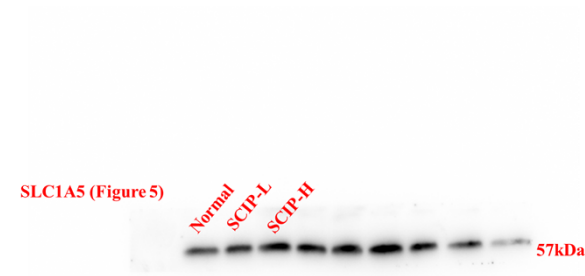

12.

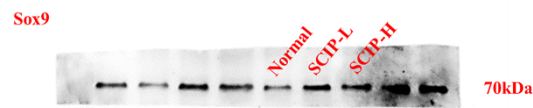

13.

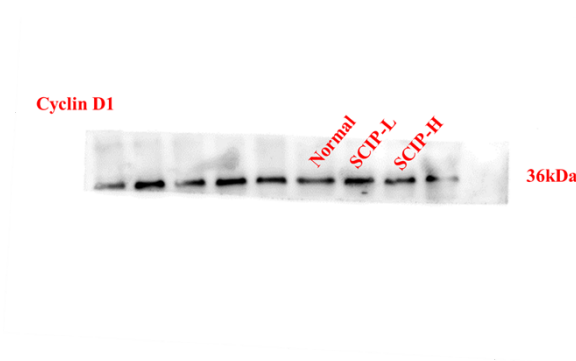

14.

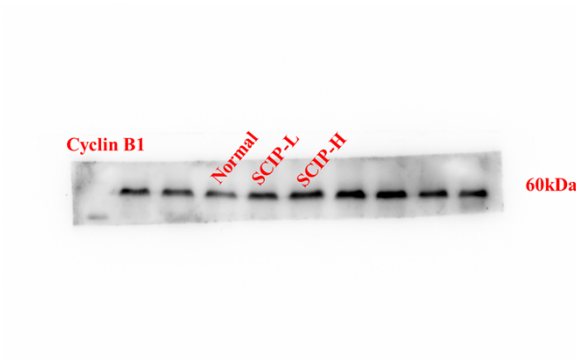

15.

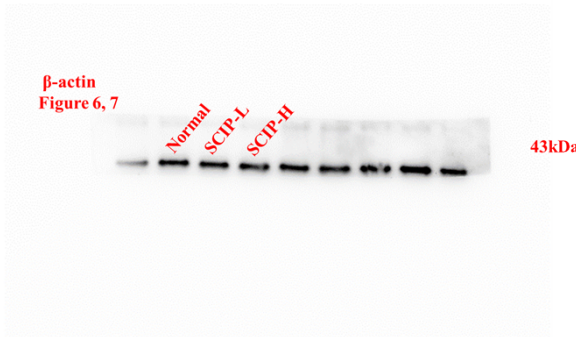

16.

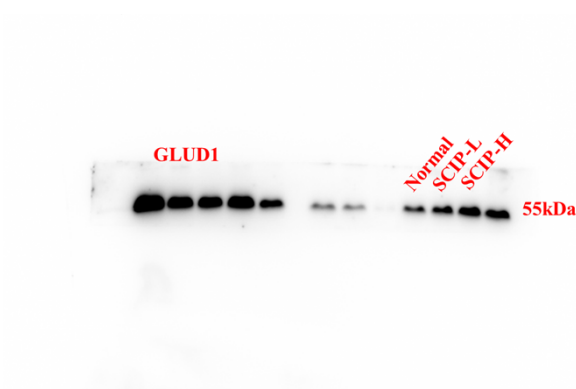

17.

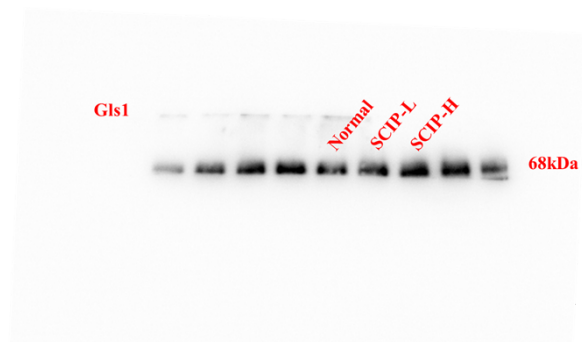

18.

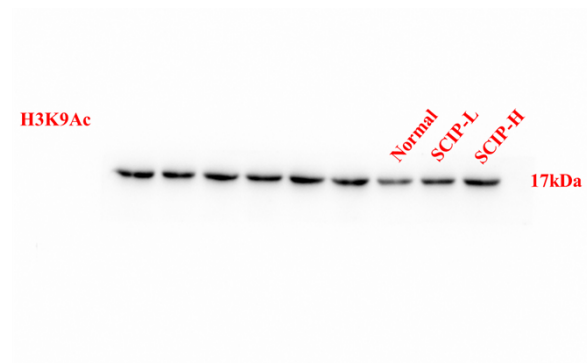

19.

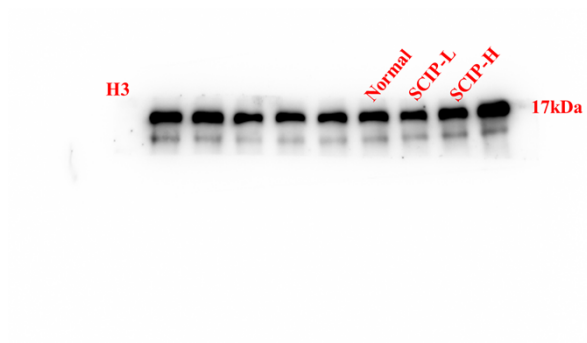

Supplement: d2fo01063a3.pdf [file d2fo01063a3.pdf]
